# Supplementary material
Source: publisher figshare collection journal article supplement (https://sage.figshare.com/ndownloader/files/24154472)
Supplement: Supplementary file 1 [file 24154472]

## **Moral distress and occupational wellbeing in audiologists: an Australian case study**

Andrea Simpson<sup>1</sup>, Alana M. Short<sup>1</sup>, Alicja N. Malicka<sup>1</sup>, Sandy Clarke-Errey<sup>2</sup>

*School of Allied Health, Human Services, and Sport, La Trobe University, Melbourne, Australia, 3086<sup>1</sup>*

*Statistical Consulting Centre, The University of Melbourne, Melbourne, Australia, 3010<sup>2</sup>*

**Keywords:** moral distress; compassion fatigue; ethics; patient-centred care; occupational stress

**Corresponding Author:** Andrea Simpson, School Allied Health, Human Services, and Sport, La Trobe University

Kingsbury Drive, Bundoora, Victoria, 3086, Australia

Email: a.simpson@latrobe.edu.au

Phone: +61 9479 1821
